# Supplementary material for: Dietary impact on infants' gut microbiota and its capacity in SCFA metabolism: a longitudinal Dutch cohort study
Source: Research Square preprint supplement (doi:10.21203/rs.3.rs-6673441/v1), 2025-06-09
Supplement: Supplementary file 1 [file ca0e9aefc4475aef0863b27a.xlsx]

## Sheet: TBL1_Variable characteristics
Supplementary Table 1A. Characteristics of the study population (n = 112).
	Overall
	(n=112)
Breastfeeding at 4 months‡
No	37 (33.0%)
Yes	75 (67.0%)
Breastfeeding at 5 months‡
No	44 (39.3%)
Yes	68 (60.7%)
Breastfeeding at 6 months‡*
No	47 (42.3%)
Yes	64 (57.7%)
Breastfeeding at 9 months‡
No	58 (51.8%)
Yes	54 (48.2%)
Breastfeeding at 11 months‡
No	65 (58.0%)
Yes	47 (42.0%)
Breastfeeding at 14 months‡*
No	74 (68.5%)
Yes	34 (31.5%)
Delivery place
At home	16 (14.3%)
At hospital	96 (85.7%)
Delivery type
C-section	17 (15.2%)
Vaginal	95 (84.8%)
Formula feeding at 4 months‡
No	52 (46.4%)
Yes	60 (53.6%)
Formula feeding at 5 months‡*
No	47 (42.3%)
Yes	64 (57.7%)
Formula feeding at 6 months‡*
No	41 (36.9%)
Yes	70 (63.1%)
Formula feeding at 9 months‡
No	24 (21.4%)
Yes	88 (78.6%)
Formula feeding at 11 months‡
No	21 (18.8%)
Yes	91 (81.3%)
Formula feeding at 14 months‡*
No	19 (17.8%)
Yes	88 (82.2%)
Furry pets at 6 months*
At daycare	8 (7.3%)
At home	36 (32.7%)
No	66 (60.0%)
Older siblings
0	70 (62.5%)
1	32 (28.6%)
2	9 (8.0%)
3	1 (0.9%)
Sex
Female	50 (44.6%)
Male	62 (55.4%)
Birth weight (grams)
Mean (SD)	3462.2 (453.8)
Gestational age (wks)
Median [Q1, Q3]	40 [39, 41]
Introduction of solids (wks)
Median [Q1, Q3]	18 [17, 20]
*Does not add up to 112 due to missing information
‡ Infants receiving combination feeding are indicated as "Yes" for both breastfeeding and formula feeding
Supplementary Table 1B. Characteristics of the numeric variables. The table shows age at introduction of solids, birth weight and gestational age for each dietary class.
	Introduction of solids (wks)
Dietary class 1	Median [Q1, Q3]	17 [16, 18]
Dietary class 2	Median [Q1, Q3]	20 [17, 24]
Dietary class 3	Median [Q1, Q3]	18 [17, 23]
	Birth weight (grams)
Dietary class 1	Mean (SD)	3445.7 (459.7)
Dietary class 2	Mean (SD)	3470.7 (426.7)
Dietary class 3	Mean (SD)	3480 (477.9)
	Gestational age (wks)
Dietary class 1	Median [Q1, Q3]	40 [39, 41]
Dietary class 2	Median [Q1, Q3]	39 [39, 40]
Dietary class 3	Median [Q1, Q3]	40 [38, 41]
Supplementary Table 1C. Statistical comparisons between the age of introduction of solids, birth weight and gestational age between dietary classes.
	Dietary class	Dietary class	Q value
Introduction of solids (wks)	DC1	DC2	0.001
Introduction of solids (wks)	DC1	DC3	0.018
Introduction of solids (wks)	DC2	DC3	0.254
Birth weight	DC1	DC2	0.965
Birth weight	DC1	DC3	0.965
Birth weight	DC2	DC3	0.965
Gestational age (wks)	DC1	DC2	0.941
Gestational age (wks)	DC1	DC3	0.941
Gestational age (wks)	DC2	DC3	0.941

## Sheet: TBL2_Fecal sample characterist
Supplementary Table 2A. Count of fecal samples (n = 389).
	Overall
Samples for each time point	(n=389)
4 months	84 (80.0%)
5 months	74 (70.5%)
6 months	66 (62.9%)
9 months	60 (57.1%)
11 months	55 (52.4%)
14 months	50 (47.6%)
Supplementary Table 2B. Fecal samples per dietary class (n = 389).
	4 months	5 months	6 months	9 months	11 months	14 months
Dietary class 1	38	39	32	26	27	22
Dietary class 2	21	16	13	17	14	14
Dietary class 3	25	19	21	17	14	14
Total	84	74	66	60	55	50

## Sheet: TBL3_KEGG_codes
Supplementary Table 3. The KEGG ortholog (KO) codes. Those codes that were identified in our sequence data are listed in the column 'KEGG code found".
Pathway name	Pathway code	SCFA	KEGG code	KEGG code found	Enzyme name
Butanoate metabolism	PATH:ko00650	butyrate	K00074	yes	hbd, fadB, mmgB,3-hydroxybutyryl-CoA dehydrogenase [EC:1.1.1.157]
Pyruvate metabolism	PATH:ko00620	acetate	K00138	yes	aldehyde dehydrogenase [EC:1.2.1.-]
Propanoate metabolism	PATH:ko00640	acetate	K00140	yes	mmsA, iolA, ALDH6A1,malonate-semialdehyde dehydrogenase (acetylating) / methylmalonate-semialdehyde dehydrogenase
Propanoate metabolism	PATH:ko00640	propionate	K00140	yes	mmsA, iolA, ALDH6A1,malonate-semialdehyde dehydrogenase (acetylating) / methylmalonate-semialdehyde dehydrogenase
Pyruvate metabolism	PATH:ko00620	acetate	K00156	yes	pyruvate dehydrogenase (quinone) [EC:1.2.5.1]
Butanoate metabolism	PATH:ko00650	butyrate	K00248	yes	ACADS; bcd; butyryl-CoA dehydrogenase [EC:1.3.8.1]
Butanoate metabolism	PATH:ko00650	butyrate	K00252	yes	glutaryl-CoA dehydrogenase [EC:1.3.8.6]
Pyruvate metabolism	PATH:ko00620	acetate	K00467	yes	lactate 2-monooxygenase [EC:1.13.12.4]
Pyruvate metabolism	PATH:ko00620	acetate	K00625	yes	pta; phosphate acetyltransferase [EC:2.3.1.8]
Pyruvate metabolism	PATH:ko00620	acetate	K00627	yes	DLAT; aceF; pdhC; pyruvate dehydrogenase E2 component (dihydrolipoyllysine-residue acetyltransferase) [EC:2.3.1.12]
Butanoate metabolism	PATH:ko00650	butyrate	K00634	yes	phosphate butyryltransferase [EC:2.3.1.19]
Pyruvate metabolism	PATH:ko00620	acetate	K00925	yes	ackA; acetate kinase [EC:2.7.2.1]
Butanoate metabolism	PATH:ko00650	butyrate	K00929	yes	buk; butyrate kinase [EC:2.7.2.7]
Propanoate metabolism	PATH:ko00640	propionate	K00932	yes	tdcD; propionate kinase [EC:2.7.2.15]
Propanoate metabolism	PATH:ko00640	propionate	K01026	yes	pct; propionate CoA-transferase [EC:2.8.3.1]
Butanoate metabolism	PATH:ko00650	butyrate	K01034	yes	but, butyryl coenzyme A-acetoacetate coenzyme A-transferase alpha subunit[EC:2.8.3.8 2.8.3.9]
Butanoate metabolism	PATH:ko00650	acetate	K01034	yes	but, acetate CoA/acetoacetate CoA-transferase alpha subunit[EC:2.8.3.8 2.8.3.9]
Butanoate metabolism	PATH:ko00650	butyrate	K01035	yes	but, acetate CoA/acetoacetate CoA-transferase beta subunit [EC:2.8.3.8 2.8.3.9]
Butanoate metabolism	PATH:ko00650	acetate	K01035	yes	but, acetate CoA/acetoacetate CoA-transferase beta subunit [EC:2.8.3.8 2.8.3.9]
Pyruvate metabolism	PATH:ko00620	acetate	K01067	yes	acetyl-CoA hydrolase [EC:3.1.2.1]
Propanoate metabolism	PATH:ko00640	propionate	K01604	no	methylmalonyl-CoA decarboxylase subunit alpha [EC:7.2.4.3]
Propanoate metabolism	PATH:ko00640	propionate	K01659	yes	prpC; 2-methylcitrate synthase [EC:2.3.3.5]
Propanoate metabolism	PATH:ko00640	propionate	K01699	no	propanediol dehydratase large subunit [EC:4.2.1.28]
Propanoate metabolism	PATH:ko00640	propionate	K01720	yes	prpD; 2-methylcitrate dehydratase [EC:4.2.1.79]
Propanoate metabolism	PATH:ko00640	propionate	K01847	yes	MUT; methylmalonyl-CoA mutase [EC:5.4.99.2]
Propanoate metabolism	PATH:ko00640	propionate	K01848	yes	E5.4.99.2A; mcmA1; methylmalonyl-CoA mutase; N-terminal domain [EC:5.4.99.2]
Propanoate metabolism	PATH:ko00640	propionate	K01849	yes	E5.4.99.2B; mcmA2; methylmalonyl-CoA mutase; C-terminal domain [EC:5.4.99.2]
Pyruvate metabolism	PATH:ko00620	acetate	K01895	yes	ACSS1_2,acetyl-CoA synthetase [EC:6.2.1.1]
Butanoate metabolism	PATH:ko00650	butyrate	K01896	no	medium-chain acyl-CoA synthetase [EC:6.2.1.2]
Propanoate metabolism	PATH:ko00640	propionate	K01899	no	succinyl-CoA synthetase alpha subunit [EC:6.2.1.4 6.2.1.5]
Propanoate metabolism	PATH:ko00640	acetate	K01899	no	succinyl-CoA synthetase alpha subunit [EC:6.2.1.4 6.2.1.5]
Propanoate metabolism	PATH:ko00640	propionate	K01900	no	succinyl-CoA synthetase beta subunit [EC:6.2.1.4 6.2.1.5]
Propanoate metabolism	PATH:ko00640	acetate	K01900	no	succinyl-CoA synthetase beta subunit [EC:6.2.1.4 6.2.1.5]
Propanoate metabolism	PATH:ko00640	propionate	K01902	yes	sucD; succinyl-CoA synthetase alpha subunit [EC:6.2.1.5]
Propanoate metabolism	PATH:ko00640	acetate	K01902	yes	sucD; succinyl-CoA synthetase alpha subunit [EC:6.2.1.5]
Propanoate metabolism	PATH:ko00640	propionate	K01903	yes	sucC; succinyl-CoA synthetase beta subunit [EC:6.2.1.5]
Propanoate metabolism	PATH:ko00640	acetate	K01903	yes	sucC; succinyl-CoA synthetase beta subunit [EC:6.2.1.5]
Pyruvate metabolism	PATH:ko00620	acetate	K01905	yes	acetate---CoA ligase (ADP-forming) subunit alpha [EC:6.2.1.13]
Propanoate metabolism	PATH:ko00640	propionate	K01908	yes	ACSS3; prpE; propionyl-CoA synthetase [EC:6.2.1.17]
Pyruvate metabolism	PATH:ko00620	acetate	K01913	no	ACN1,acetate/butyrate---CoA ligase [EC:6.2.1.1 6.2.1.2]
Butanoate metabolism	PATH:ko00650	butyrate	K01913	no	ACN1, acetate/butyrate---CoA ligase [EC:6.2.1.1 6.2.1.2]
Propanoate metabolism	PATH:ko00640	propionate	K01964	no	PCCA; pccA; propionyl-CoA carboxylase [EC:6.4.1.3]
Propanoate metabolism	PATH:ko00640	propionate	K01965	yes	PCCA; pccA; propionyl-CoA carboxylase alpha subunit [EC:6.4.1.3]
Propanoate metabolism	PATH:ko00640	propionate	K01966	yes	PCCA; pccA; propionyl-CoA carboxylase beta subunit [EC:6.4.1.3]
Propanoate metabolism	PATH:ko00640	propionate	K03416	yes	methylmalonyl-CoA carboxyltransferase 5S subunit [EC:2.1.3.1]
Pyruvate metabolism	PATH:ko00620	acetate	K04020	yes	phosphotransacetylase
Propanoate metabolism	PATH:ko00640	propionate	K05606	yes	MCEE; epi; methylmalonyl-CoA/ethylmalonyl-CoA epimerase [EC:5.1.99.1]
Propanoate metabolism	PATH:ko00640	propionate	K11264	yes	methylmalonyl-CoA decarboxylase [EC:4.1.1.-]
Pyruvate metabolism	PATH:ko00620	acetate	K13788	yes	pta; phosphate acetyltransferase [EC:2.3.1.8]
Propanoate metabolism	PATH:ko00640	propionate	K13919	no	propanediol dehydratase medium subunit [EC:4.2.1.28]
Propanoate metabolism	PATH:ko00640	propionate	K13920	no	propanediol dehydratase small subunit [EC:4.2.1.28]
Propanoate metabolism	PATH:ko00640	propionate	K13922	yes	pduP; propionaldehyde dehydrogenase [EC:1.2.1.87]
Propanoate metabolism	PATH:ko00640	propionate	K13923	yes	pduL; phosphate propanoyltransferase [EC:2.3.1.222]
Butanoate metabolism	PATH:ko00650	butyrate	K14534	yes	4-hydroxybutyryl-CoA dehydratase / vinylacetyl-CoA-Delta-isomerase [EC:4.2.1.120 5.3.3.3]
Pyruvate metabolism	PATH:ko00620	acetate	K15024	yes	putative phosphotransacetylase [EC:2.3.1.8]
Propanoate metabolism	PATH:ko00640	propionate	K15036	no	acetyl-CoA/propionyl-CoA carboxylase [EC:6.4.1.2 6.4.1.3 2.1.3.15]
Propanoate metabolism	PATH:ko00640	propionate	K17489	yes	methylmalonyl-CoA carboxyltransferase 12S subunit [EC:2.1.3.1]
Propanoate metabolism	PATH:ko00640	propionate	K17490	yes	methylmalonyl-CoA carboxyltransferase 1.3S subunit [EC:2.1.3.1]
Butanoate metabolism	PATH:ko00650	butyrate	K17829	no	crotonyl-CoA reductase [EC:1.3.1.86]
Butanoate metabolism	PATH:ko00650	butyrate	K17865	yes	croR; 3-hydroxybutyryl-CoA dehydratase [EC:4.2.1.55]
Butanoate metabolism	PATH:ko00650	butyrate	K18014	yes	3-aminobutyryl-CoA ammonia-lyase [EC:4.3.1.14]
Pyruvate metabolism	PATH:ko00620	acetate	K18118	yes	cat1,succinyl-CoA:acetate CoA-transferase [EC:2.8.3.18]
Pyruvate metabolism	PATH:ko00620	propionate	K18366	no	bphJ, xylQ, nahO, tesF, acetaldehyde/propanal dehydrogenase [EC:1.2.1.10 1.2.1.87]
Propanoate metabolism	PATH:ko00640	propionate	K18426	no	ethylmalonyl-CoA/methylmalonyl-CoA decarboxylase [EC:4.1.1.94 4.1.1.-]
Propanoate metabolism	PATH:ko00640	propionate	K19697	yes	propionate kinase [EC:2.7.2.15]
Propanoate metabolism	PATH:ko00640	propionate	K20143	yes	acrylyl-CoA reductase (NADH) [EC:1.3.1.95]
Propanoate metabolism	PATH:ko00640	propionate	K20626	yes	lactoyl-CoA dehydratase subunit alpha [EC:4.2.1.54]
Propanoate metabolism	PATH:ko00640	propionate	K20627	yes	lactoyl-CoA dehydratase subunit beta [EC:4.2.1.54]
Propanoate metabolism	PATH:ko00640	propionate	K22214	yes	scpC; propionyl-CoA:succinyl-CoA transferase [EC:2.8.3.27]
Pyruvate metabolism	PATH:ko00620	acetate	K22224	yes	acetate---CoA ligase (ADP-forming) subunit beta [EC:6.2.1.13]
Butanoate metabolism	PATH:ko00650	butyrate	K23756	no	LAE,medium-chain acyl-CoA ligase / lipoate-activating enzyme [EC:6.2.1.2]
Pyruvate metabolism	PATH:ko00620	acetate	K24012	no	acetate---CoA ligase (ADP-forming) [EC:6.2.1.13]
Propanoate metabolism	PATH:ko00640	propionate	K27797	no	prpC; 2-methylcitrate synthase [EC:2.3.3.5]

## Sheet: TBL4_Grouping of solids
Supplementary Table 4. Time when specific food items were asked in the questionnaires and indication of grouping of food items*.
4 months	5 months	6 months	9 months	11 months	14 months	Food item in questionner	Group
no	no	no	no	no	yes	butter	butter
no	no	no	yes	yes	no	creambutter	butter
no	no	no	yes	yes	yes	cheese	dairy
yes	yes	yes	yes	yes	yes	milk	dairy
yes	yes	yes	yes	yes	yes	yoghurt	dairy
no	no	no	yes	yes	yes	egg	eggs
no	no	no	yes	yes	yes	fattyfish	fish
yes	yes	yes	no	no	no	fish	fish
yes	yes	yes	yes	yes	yes	apple	fruits
yes	yes	yes	yes	yes	yes	banana	fruits
yes	yes	yes	yes	yes	yes	kiwi	fruits
yes	yes	yes	yes	yes	yes	melon	fruits
yes	yes	yes	yes	yes	yes	orange	fruits
yes	yes	yes	yes	yes	yes	peach	fruits
yes	yes	yes	yes	yes	yes	pear	fruits
yes	yes	yes	yes	yes	yes	strawberry	fruits
yes	yes	yes	yes	yes	yes	tomato	fruits
yes	yes	yes	no	no	no	bread	grains
no	no	no	yes	yes	yes	brownbread	grains
yes	yes	yes	yes	yes	yes	pasta	grains
yes	yes	yes	yes	yes	yes	rice	grains
no	no	no	yes	yes	yes	whitebread	grains
no	no	no	yes	yes	yes	wholegrainbread	grains
yes	yes	yes	no	no	yes	beans	legumes/nuts
no	no	no	yes	yes	no	greenbeans	legumes/nuts
yes	yes	yes	yes	yes	yes	porridge	legumes/nuts
no	no	no	yes	yes	no	low-fat margarine	margarine
no	no	no	no	no	yes	margarine	margarine
no	no	no	yes	yes	yes	beef	meat
no	no	no	yes	yes	yes	chicken	meat
yes	yes	yes	no	no	no	meat	meat
no	no	no	yes	yes	yes	pork	meat
no	no	yes	yes	yes	yes	pudding	pudding
no	no	no	yes	yes	yes	soy products	soy products
yes	yes	yes	yes	yes		broccoli	vegetables
yes	yes	yes	yes	yes	yes	carrots	vegetables
yes	yes	yes	yes	yes	yes	cauliflower	vegetables
yes	yes	yes	yes	yes	yes	potato	vegetables
*Tea, biscuit, red beets, rice cake, breadstick, buttermilk, apple juice, and soy milk were excluded due to either a high number of "no" responses or a significant number of missing data points

## Sheet: TBL5_Time of solids intro
Supplementary Table 5A. Time of introduction for each of the food items for each of the dietary classes. An item was considered to be introduced if more than 50% of infants within a dietary class received it.
Food item	Dietary class 1	Dietary class 2	Dietary class 3
apple	5m	6m	6m
banana	5m	5m	5m
beans	6m	9m	9m
bread	6m	9m	9m
broccoli	5m	6m	6m
butter	NA	NA	11m
carrots	5m	5m	5m
cauliflower	5m	6m	6m
cheese	14m	14m	11m
egg	9m	9m	9m
fish	9m	11m	11m
kiwi	9m	NA	11m
margarine	9m	9m	11m
meat	9m	9m	9m
melon	NA	NA	6m
milk	14m	14m	14m
orange	14m	NA	NA
pasta	9m	9m	9m
peach	9m	NA	NA
pear	5m	6m	6m
porridge	6m	6m	9m
potato	6m	6m	6m
pudding	NA	NA	NA
rice	9m	9m	9m
soy products	NA	NA	NA
strawberry	9m	NA	14m
tomato	9m	11m	9m
yoghurt	9m	11m	9m
Supplementary Table 5B. Summary of new food items introduced at each time point for the different dietary classes (n = 28). An item was considered to be introduced if more than 50% of infants within a dietary class received it.
Time points	Dietary class 1	Dietary class 2	Dietary class 3
4m	0	0	0
5m	6	2	2
6m	4	6	6
9m	11	7	9
11m	0	3	5
14m	3	2	2
NA*	4	8	4
total food items	28	28	28
introduced food items	24	20	24
*food items that never reached 50% threshold, i.e. <50% of infants received these food item during the study follow-up

## Sheet: TBL6_Proportion of solids
Supplementary Table 6. Proportion of infants in each dietary class receiving specific food items per time point.
Food item	Dietary class 1	Dietary class 2	Dietary class 3	Time point
apple	0.12	0	0.12	4m
banana	0.27	0.04	0.24	4m
beans	0.1	0	0	4m
bread	0	0	0	4m
broccoli	0.2	0	0.03	4m
butter	0	0	0	4m
carrots	0.39	0.15	0.12	4m
cauliflower	0.18	0.07	0.03	4m
cheese	0	0	0	4m
egg	0	0	0	4m
fish	0	0	0	4m
kiwi	0	0	0	4m
margarine	0	0	0	4m
meat	0	0	0	4m
melon	0.06	0	0.06	4m
milk	0	0	0	4m
orange	0	0	0	4m
pasta	0	0	0	4m
peach	0.06	0	0	4m
pear	0.2	0	0.09	4m
porridge	0.04	0.04	0.06	4m
potato	0.04	0.04	0.03	4m
pudding	0	0	0	4m
rice	0	0	0.03	4m
soy products	0	0	0	4m
strawberry	0.02	0	0.03	4m
tomato	0	0	0.03	4m
yoghurt	0.02	0	0	4m
apple	0.69	0.44	0.32	5m
banana	0.78	0.52	0.5	5m
beans	0.39	0.19	0.12	5m
bread	0.12	0	0.03	5m
broccoli	0.69	0.3	0.26	5m
butter	0	0	0	5m
carrots	0.9	0.52	0.62	5m
cauliflower	0.69	0.44	0.38	5m
cheese	0	0	0	5m
egg	0	0	0	5m
fish	0.04	0	0	5m
kiwi	0.08	0	0	5m
margarine	0	0	0	5m
meat	0.02	0	0	5m
melon	0.22	0	0.15	5m
milk	0	0	0	5m
orange	0.06	0.11	0.03	5m
pasta	0	0	0.03	5m
peach	0.16	0.07	0.06	5m
pear	0.69	0.37	0.26	5m
porridge	0.35	0.37	0.18	5m
potato	0.25	0.3	0.12	5m
pudding	0	0	0	5m
rice	0.12	0.11	0.03	5m
soy products	0	0	0	5m
strawberry	0.14	0.07	0.03	5m
tomato	0.06	0	0.03	5m
yoghurt	0.04	0	0	5m
apple	0.92	0.63	0.88	6m
banana	0.98	0.74	0.97	6m
beans	0.67	0.37	0.47	6m
bread	0.61	0.48	0.47	6m
broccoli	0.94	0.59	0.79	6m
butter	0	0	0	6m
carrots	0.98	0.74	0.94	6m
cauliflower	0.92	0.59	0.71	6m
cheese	0	0	0	6m
egg	0	0	0	6m
fish	0.16	0.15	0.15	6m
kiwi	0.2	0.07	0.06	6m
margarine	0	0	0	6m
meat	0.27	0.26	0.18	6m
melon	0.41	0.04	0.53	6m
milk	0.04	0	0	6m
orange	0.04	0.04	0.03	6m
pasta	0.27	0.15	0.21	6m
peach	0.24	0.11	0.09	6m
pear	0.96	0.7	0.76	6m
porridge	0.69	0.56	0.35	6m
potato	0.69	0.59	0.59	6m
pudding	0.04	0.04	0	6m
rice	0.43	0.19	0.35	6m
soy products	0	0	0	6m
strawberry	0.22	0.11	0.15	6m
tomato	0.12	0	0.09	6m
yoghurt	0.1	0.04	0.12	6m
apple	0.98	0.81	0.94	9m
banana	0.96	0.96	0.94	9m
beans	0.88	0.59	0.71	9m
bread	0.98	1	0.97	9m
broccoli	0.98	0.89	1	9m
butter	0.12	0.26	0.47	9m
carrots	0.98	0.93	0.97	9m
cauliflower	0.98	0.85	1	9m
cheese	0.29	0.26	0.35	9m
egg	0.76	0.59	0.68	9m
fish	0.59	0.37	0.35	9m
kiwi	0.65	0.3	0.41	9m
margarine	0.86	0.63	0.47	9m
meat	0.88	0.78	0.74	9m
melon	0.49	0.15	0.68	9m
milk	0.06	0.07	0.03	9m
orange	0.41	0.3	0.32	9m
pasta	0.92	0.74	0.94	9m
peach	0.51	0.3	0.35	9m
pear	0.98	0.85	0.94	9m
porridge	0.82	0.67	0.62	9m
potato	1	0.93	0.94	9m
pudding	0.14	0.11	0.03	9m
rice	0.86	0.63	0.79	9m
soy products	0.04	0.15	0.12	9m
strawberry	0.73	0.26	0.32	9m
tomato	0.88	0.37	0.65	9m
yoghurt	0.63	0.37	0.53	9m
apple	0.88	0.78	0.76	11m
banana	0.96	1	0.97	11m
beans	0.88	0.74	0.65	11m
bread	1	1	1	11m
broccoli	0.96	0.89	0.79	11m
butter	0.12	0.26	0.62	11m
carrots	0.94	0.93	0.94	11m
cauliflower	0.9	0.7	0.82	11m
cheese	0.37	0.44	0.56	11m
egg	0.82	0.63	0.76	11m
fish	0.63	0.52	0.62	11m
kiwi	0.69	0.41	0.5	11m
margarine	0.94	0.63	0.53	11m
meat	0.96	0.7	0.79	11m
melon	0.47	0.15	0.59	11m
milk	0.16	0.19	0.15	11m
orange	0.43	0.19	0.47	11m
pasta	0.94	0.89	1	11m
peach	0.47	0.33	0.26	11m
pear	0.94	0.78	0.74	11m
porridge	0.75	0.52	0.5	11m
potato	0.98	0.96	1	11m
pudding	0.24	0.19	0.09	11m
rice	0.82	0.78	0.88	11m
soy products	0.04	0.15	0.15	11m
strawberry	0.63	0.41	0.32	11m
tomato	0.84	0.52	0.76	11m
yoghurt	0.8	0.59	0.71	11m
apple	0.88	0.67	0.79	14m
banana	0.96	1	1	14m
beans	0.86	0.78	0.82	14m
bread	1	1	1	14m
broccoli	0.94	0.93	0.91	14m
butter	0.1	0.26	0.68	14m
carrots	0.98	0.89	0.94	14m
cauliflower	0.88	0.89	0.85	14m
cheese	0.65	0.7	0.71	14m
egg	0.88	0.74	0.79	14m
fish	0.73	0.7	0.53	14m
kiwi	0.69	0.48	0.53	14m
margarine	0.96	0.78	0.41	14m
meat	0.98	0.89	0.88	14m
melon	0.47	0.15	0.68	14m
milk	0.82	0.78	0.65	14m
orange	0.51	0.22	0.41	14m
pasta	0.94	0.89	1	14m
peach	0.37	0.19	0.32	14m
pear	0.82	0.74	0.82	14m
porridge	0.57	0.37	0.35	14m
potato	0.98	1	1	14m
pudding	0.25	0.15	0.21	14m
rice	0.92	0.89	0.88	14m
soy products	0.08	0.11	0.21	14m
strawberry	0.65	0.48	0.65	14m
tomato	0.96	0.63	0.88	14m
yoghurt	0.84	0.52	0.94	14m

## Sheet: Food diveristy statistics
Table S5. Statistics for food diversity. Food variety score (FVS)
Age	Group1	gGoup2	n1	n2	Statistic	p	p.adj.	p.adj.signif
4m	1	2	51	27	1024.5	0.00013	0.00039	***
4m	1	3	51	34	1136	0.01	0.015	*
4m	2	3	27	34	385.5	0.17	0.17	ns
5m	1	2	51	27		0.000395	0.000593	***
5m	1	3	51	34		3.1e-06	9.3e-06	****
5m	2	3	27	34		0.398	0.398	ns
6m	1	2	51	27	984.5	0.002	0.006	**
6m	1	3	51	34	1158.5	0.009	0.013	*
6m	2	3	27	34	391.5	0.328	0.328	ns
9m	1	2	51	27		1.21e-08	3.64e-08	****
9m	1	3	51	34		0.0014	0.0021	**
9m	2	3	27	34		0.00483	0.00483	**
11m	1	2	51	27	1046	0.000165	0.000495	***
11m	1	3	51	34	1137	0.015	0.022	*
11m	2	3	27	34	318.5	0.041	0.041	*
14m	1	2	51	27		8.21e-05	0.000246	***
14m	1	3	51	34		0.204	0.204	ns
14m	2	3	27	34		0.00846	0.0127	*
Table S6. Statistics for food diversity. Dietary diversity score (DDS)
Age	Group1	gGoup2	n1	n2	Statistic	p	p.adj.	p.adj.signif
4m	1	2	51	27		0.000546	0.00164	**
4m	1	3	51	34		0.0148	0.0221	*
4m	2	3	27	34		0.248	0.248	ns
5m	1	2	51	27	957.5	0.003	0.005	**
5m	1	3	51	34	1386.5	9.84e-07	2.95e-06	****
5m	2	3	27	34	499	0.553	0.553	ns
6m	1	2	51	27	896	0.024	0.052	ns
6m	1	3	51	34	1095	0.035	0.052	ns
6m	2	3	27	34	420	0.567	0.567	ns
9m	1	2	51	27		0.000673	0.00202	**
9m	1	3	51	34		0.00251	0.00376	**
9m	2	3	27	34		0.566	0.566	ns
11m	1	2	51	27		0.0098	0.0294	*
11m	1	3	51	34		0.0781	0.117	ns
11m	2	3	27	34		0.37	0.37	ns
14m	1	2	51	27	764.5	0.376	0.54	ns
14m	1	3	51	34	1070.5	0.046	0.139	ns
14m	2	3	27	34	499	0.54	0.54	ns
Table S7. Statistics for food diversity. Food allergen diversity (FAD)
Age	Group1	gGoup2	n1	n2	Statistic	p	p.adj.	p.adj.signif
4m	1	2	51	27		0.965	0.965	ns
4m	1	3	51	34		0.673	0.965	ns
4m	2	3	27	34		0.687	0.965	ns
5m	1	2	51	27		0.238	0.238	ns
5m	1	3	51	34		0.00643	0.0193	*
5m	2	3	27	34		0.199	0.238	ns
6m	1	2	51	27		0.174	0.262	ns
6m	1	3	51	34		0.0138	0.0413	*
6m	2	3	27	34		0.376	0.376	ns
9m	1	2	51	27		0.111	0.167	ns
9m	1	3	51	34		0.0381	0.114	ns
9m	2	3	27	34		0.749	0.749	ns
11m	1	2	51	27		0.102	0.307	ns
11m	1	3	51	34		0.332	0.495	ns
11m	2	3	27	34		0.495	0.495	ns
14m	1	2	51	27		0.12	0.179	ns
14m	1	3	51	34		0.015	0.0451	*
14m	2	3	27	34		0.502	0.502	ns

## Sheet: TBL7_Time of solid intro_statis
Supplementary Table 7. Test of Equal Proportions of Infants receiving specific food items between dietary classes.
Food item*	4 months		5 months		6 months		9 months		11 months		14 months
	Statistic (x^2)	P value	Statistic (x^2)	P value	Statistic (x^2)	P value	Statistic (x^2)	P value	Statistic (x^2)	P value	Statistic (x^2)	P value
apple	3.488	0.175	11.519	0.003	11.826	0.003	7.414	0.025	2.387	0.303	5.231	0.073
banana	6.369	0.041	9.148	0.01	15.435	0	0.232	0.89	1.054	0.59	2.436	0.296
beans	6.26	0.044	9.02	0.011	7064	0.029	8.852	0.012	6.78	0.034	0.921	0.631
bread	NaN	1	5.082	0.079	1.966	0.374	0.759	0.684	NaN	1	NaN	1
broccoli	10273	0.006	18.613	0	14.189	0.001	6.1	0.047	5.929	0.052	0.27	0.874
butter	NaN	1	NaN	1	NaN	1	13.243	0.001	24.454	0	32.239	0
carrot	10.167	0.006	15.685	0	13026	0.001	1.577	0.455	0.081	0.96	2.942	0.23
cauliflower	5.018	0.081	8.767	0.012	12.435	0.002	9.12	0.01	4.942	0.084	0.224	0.894
cheese	NaN	1	NaN	1	NaN	1	0.664	0.717	2.865	0.239	0.427	0.808
egg	NaN	1	NaN	1	NaN	1	2.566	0.277	3.637	0.162	2.662	0.264
fish	NaN	1	2.436	0.296	0.019	0.991	5.802	0.055	0.948	0.622	3.792	0.15
kiwi	NaN	1	4.962	0.084	4.357	0.113	9.92	0.007	6.354	0.042	3.782	0.151
margarine	NaN	1	NaN	1	NaN	1	15.157	0.001	20.328	0	32.941	0
meat	NaN	1	1.207	0.547	1.136	0.567	3.177	0.204	10.172	0.006	3.801	0.15
melon	1.662	0.436	6.714	0.035	17.108	0	17.141	0	12.577	0.002	17.025	0
milk	NaN	1	NaN	1	2.436	0.296	0.643	0.725	0.172	0.917	3.541	0.17
orange	NaN	1	1.736	0.42	0.059	0.971	1.265	0.531	6.074	0.048	6.033	0.049
pasta	NaN	1	2.315	0.314	1.71	0.425	7.186	0.028	3.715	0.156	3.715	0.156
peach	3.687	0.158	2.456	0.293	3.92	0.141	3.998	0.135	3.953	0.139	2.912	0.233
pear	6.984	0.03	16.301	0	10.663	0.005	4.989	0.083	7.409	0.025	0.89	0.641
porridge	0.232	0.89	3.756	0.153	9.173	0.01	4.888	0.087	6.613	0.037	4.863	0.088
potato	0.059	0.971	3.312	0.191	1.107	0.575	3.57	0.168	1.193	0.551	1.207	0.547
pudding	NaN	1	NaN	1	1.347	0.51	2.746	0.253	3.018	0.221	1.215	0.545
rice	2.315	0.314	2.162	0.339	4.719	0.094	5.718	0.057	1.199	0.549	0.421	0.81
soy products	NaN	1	NaN	1	NaN	1	3059	0.217	3.68	0.159	3.092	0.213
strawberry	0.759	0.684	3.019	0.221	1.547	0.461	20.838	0	8.343	0.015	2.355	0.308
tomato	2.315	0.314	1.83	0.401	3.347	0.188	21.911	0	9.837	0.007	16.064	0
yoghurt	1.207	0.547	2.436	0.296	1.291	0.524	4.699	0.095	4.012	0.135	17.824	0
* in bold food items are visualized in Figure 1 panel D
Degrees of freedom - 2 for each case
If statistic = NaN or p-value = 1, then proportions are equal

## Sheet: TBL8_Food diversity assessment
Supplementary Table 8. Differences in average (median, IQR) food diversity scores between each of the dietary class.
	Median [IQR]						Q values (with dietary class 2)						Q values (with dietary class 3)
Dietary class 1	4 months	5 months	6 months	9 months	11 months	14 months	4 months	5 months	6 months	9 months	11 months	14 months	4 months	5 months	6 months	9 months	11 months	14 months
Food variety score	2 [0, 3]	6 [5, 8]	11 [9, 13]	19 [18,21]	19 ]18, 21.5]	21 [18.5, 22]	<0.001	0.001	0.006	<0.001	<0.001	<0.001	0.015	<0.001	0.013	0.002	0.022	0.204
Dietary diversity score	1 [0, 2]	3 [2, 3]	4 [3, 5]	7 [6.5, 8]	7 [7, 8]	8 [7, 8]	0.002	0.005	0.052	0.002	0.029	0.54	0.022	<0.001	0.052	0.004	0.117	0.139
Food allergen diversity	0 [0, 0]	0 [0, 1]	1 [1, 2]	3 [3, 4]	3 [3, 4]	4 [4, 5]	0.965	0.238	0.262	0.167	0.307	0.179	0.965	0.019	0.041	0.114	0.395	0.045
	Median [IQR]						Q values (with dietary class 3)
Dietary class 2	4 months	5 months	6 months	9 months	11 months	14 months	4 months	5 months	6 months	9 months	11 months	14 months
Food variety score	0 [0, 0]	4 [0, 6.5]	8 [3, 10.5]	15 [12, 17.5]	16 [14, 18.5]	18 [16, 20]	0.17	0.398	0.328	0.005	0.041	0.127
Dietary diversity score	0 [0, 0]	2 [0, 3]	4 [2, 4]	6 [5, 7]	7 [6, 7.5]	8 [7, 8]	0.248	0.553	0.567	0.566	0.37	0.54
Food allergen diversity	0 [0, 0]	0 [0,1 ]	1 [0.5, 2]	3 [2, 3]	3 [2, 4]	4 [3, 4]	0.965	0.238	0.376	0.749	0.495	0.502
	Median [IQR]
Dietary class 3	4 months	5 months	6 months	9 months	11 months	14 months
Food variety score	0 [0, 1]	3 [0.3, 5]	8 [7, 11]	17 [15, 19]	18 [16, 19.8]	19.5 [18, 22]
Dietary diversity score	0 [0, 1]	2 [0.3, 2]	3.5 [3, 4]	6 [5, 7]	7 [6, 8]	7 [6.3, 8]
Food allergen diversity	0 [0, 0]	0 [0, 0]	1 [0, 1]	3 [2, 3]	3.5 [2.3, 4]	3.5 [3, 4]

## Sheet: TBL9_fruits_KW_Dunn
Supplementary Table 9A. Kruskal–Wallis test for fruits consumed across diet classes at each time point.
Timepoint	H statistic	df	P value	Significance
4 months	7.72419	2	0.021024	*
5 months	13.6173	2	0.0011042	**
6 months	11.4996	2	0.00318335	**
9 months	13.962	2	0.00092938	***
11 months	9.30631	2	0.00953146	**
14 months	6.24123	2	0.0441301	*
Supplementary Table 9B. Supplementary Table 8B. Post-hoc Dunn’s test for timepoints across dietary classes following Kruskal–Wallis tests.
Timepoint	Dietary class comparison	Z	P value	Q value	Significance
4 months	DC1 - DC2	2.77529	0.00551523	0.0165457	*
4 months	DC1 - DC3	1.18029	0.237884	0.237884
4 months	DC2 - DC3	-1.52255	0.127872	0.191808
5 months	DC1 - DC2	2.29154	0.0219323	0.0328985	*
5 months	DC1 - DC3	3.45856	0.000543073	0.00162922	**
5 months	DC2 - DC3	0.846673	0.397177	0.397177
6 months	DC1 - DC2	3.3091	0.000935958	0.00280787	**
6 months	DC1 - DC3	1.81712	0.0691986	0.103798
6 months	DC2 - DC3	-1.63794	0.101433	0.101433
9 months	DC1 - DC2	3.71473	0.000203419	0.000610257	***
9 months	DC1 - DC3	1.83917	0.0658898	0.0988348
9 months	DC2 - DC3	-1.70555	0.0880926	0.0880926
11 months	DC1 - DC2	2.78035	0.0054301	0.0162903	*
11 months	DC1 - DC3	2.12932	0.0332281	0.0498422	*
11 months	DC2 - DC3	-0.567279	0.570525	0.570525
14 months	DC1 - DC2	2.47177	0.0134446	0.0403338	*
14 months	DC1 - DC3	0.627057	0.530622	0.530622
14 months	DC2 - DC3	-1.66861	0.0951955	0.142793

[truncated: 15 more sheets: TBL10_Alpha diversity, TBL11_Beta diversity, TBL12_PERMANOVA, TBL13_Relative maturity, TBL14_DMM, TBL15_DMM_alpha_KW_Dunn, TBL16_DMM_KW_Dunn, TBL17_LINDA, TBL18_Mean_DF_DC, TBL19_Fiber_KW_Dunn, TBL20_Fibre_diet_tstats, TBL21_fiber_species_spearma, TBL22_Fiber degraders, TBL23_fiber_diet_TP_KW_Dunn, TBL24_scfa_kruskal_Dunn]
